# Supplementary material
Source: MDPI journal article supplement (https://www.mdpi.com/2504-4990/6/1/32)
Supplement: s1 [file s1]

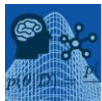

## Supplementary Information

**Supplementary Table 1.** Original dataset containing 1002 patients with esophageal cancer that underwent surgical therapy. 110 patient characteristics are listed with amount and percentage if not otherwise depicted. Missing variables are not listed individually, but represent the remainder if the sum of the individual variables does not add up to 100 percent.

|                                                 | No.             | %         |
|-------------------------------------------------|-----------------|-----------|
| Total patients ( <i>n</i> )                     | 1002            |           |
| <b>CLINICAL CHARACTERISTICS</b>                 |                 |           |
| Age at surgical treatment, mean $\pm$ SD (y)    | 62.2 $\pm$ 10.1 |           |
| Sex assigned at birth                           |                 |           |
| <i>Female</i>                                   | 157             | 15.7      |
| <i>Male</i>                                     | 845             | 84.3      |
| BMI, mean $\pm$ SD (kg/m <sup>2</sup> )         | 25.9 $\pm$ 4.6  |           |
| Height, mean $\pm$ SD (cm)                      | 176 $\pm$ 9.5   |           |
| Weight at primary staging (kg)                  | 83.3 $\pm$ 18.3 |           |
| Weight loss                                     |                 |           |
| <i>yes/no</i>                                   | 100/114         | 9.98/11.3 |
| <i>kg, mean <math>\pm</math> SD</i>             | 4.9 $\pm$ 7.5   |           |
| <i>months, mean <math>\pm</math> SD</i>         | 2.7 $\pm$ 3.6   |           |
| Ogilvie Dysphagia Scale                         |                 |           |
| 0                                               | 53              | 5.3       |
| 1                                               | 58              | 5.8       |
| 2                                               | 44              | 4.4       |
| 3                                               | 23              | 2.3       |
| 4                                               | 6               | 0.6       |
| Duration dysphagia, mean $\pm$ SD (y)           | 2.3 $\pm$ 2.4   |           |
| Preoperative WBC count ( $\times 10^9/L$ )      |                 |           |
| < 4.4                                           | 33              | 3.3       |
| > 4.4                                           | 668             | 66.7      |
| Preoperative platelet count ( $\times 10^9/L$ ) |                 |           |
| < 150                                           | 18              | 1.8       |
| > 150                                           | 683             | 68.2      |
| ASA-Score                                       |                 |           |
| 1                                               | 31              | 3.1       |
| 2                                               | 394             | 39.3      |
| 3                                               | 271             | 27.05     |
| 4                                               | 5               | 0.5       |
| <b>MEDICAL HISTORY</b>                          |                 |           |
| ECOG-Score                                      |                 |           |
| 0                                               | 195             | 19.5      |

|                                                   |             |               |
|---------------------------------------------------|-------------|---------------|
| 1                                                 | 207         | 20.7          |
| 2                                                 | 62          | 61.9          |
| 3                                                 | 9           | 0.9           |
| Arterial hypertension,<br>yes/no                  | 309/<br>204 | 30.8/<br>20.4 |
| Antiplatelet agents                               |             |               |
| <i>none</i>                                       | 453         | 45.2          |
| <i>any</i>                                        | 15          | 1.5           |
| <i>ASA</i>                                        | 93          | 9.3           |
| AT-II receptor antagonist,<br>yes/no              | 84/<br>429  | 8.4/<br>42.8  |
| ACE-inhibitor,<br>yes/no                          | 113/<br>399 | 11.3/<br>39.8 |
| Statins,<br>yes/no                                | 97/<br>417  | 9.7/<br>41.6  |
| Diuretics,<br>yes/no                              | 116/<br>398 | 11.6/<br>39.7 |
| Beta-blocker,<br>yes/no                           | 164/<br>349 | 16.4/<br>34.8 |
| Calcium channel blocker,<br>yes/no                | 66/<br>448  | 6.6/<br>44.7  |
| Smoking history                                   |             |               |
| <i>Non-smoker</i>                                 | 279         | 27.8          |
| <i>Smoker</i>                                     | 153         | 15.3          |
| <i>Ex-smoker</i>                                  | 177         | 17.7          |
| Alcohol consumption                               |             |               |
| <i>No alcohol</i>                                 | 326         | 32.5          |
| <i>1-3 times/week</i>                             | 41          | 4.1           |
| <i>4-5 times/week</i>                             | 8           | 0.8           |
| <i>daily</i>                                      | 35          | 3.5           |
| <b>MEDICAL TREATMENT</b>                          |             |               |
| Neoadjuvant therapy,<br>yes/no                    | 692/<br>263 | 69.1/<br>26.2 |
| Type of neoadjuvant therapy                       |             |               |
| <i>CROSS protocol [1]</i>                         | 401         | 40.02         |
| <i>FLOT protocol [2]</i>                          | 109         | 10.9          |
| <i>other</i>                                      | 204         | 20.4          |
| One-/Two-stage procedure                          |             |               |
| <i>One-stage</i>                                  | 667         | 66.6          |
| <i>Two-stage</i>                                  | 34          | 3.4           |
| Surgical procedure (Ivor-Lewis-<br>Esophagectomy) |             |               |
| <i>Open</i>                                       | 80          | 7.9           |
| <i>Hybrid</i>                                     | 587         | 58.6          |
| <i>Totally minimally<br/>invasive</i>             | 15          | 1.5           |
| <i>Robot-Assisted</i>                             | 18          | 1.8           |
| <i>Minimally Invasive</i>                         |             |               |

| COMPLICATIONS                                                 |                |               |  |
|---------------------------------------------------------------|----------------|---------------|--|
| Clavien-Dindo-classification                                  |                |               |  |
| <i>none</i>                                                   | 274            | 27.3          |  |
| <i>1</i>                                                      | 30             | 2.9           |  |
| <i>2</i>                                                      | 59             | 5.9           |  |
| <i>3a</i>                                                     | 230            | 22.9          |  |
| <i>3b</i>                                                     | 31             | 3.1           |  |
| <i>4a</i>                                                     | 61             | 6.1           |  |
| <i>4b</i>                                                     | 14             | 1.4           |  |
| <i>5</i>                                                      | 1              | 0.1           |  |
| Postoperative pneumonia,<br>yes/no                            | 72/<br>629     | 7.2/<br>62.8  |  |
| Postoperative pylorospasm,<br>yes/no                          | 139/<br>513    | 13.9/<br>51.2 |  |
| Anastomosis leak,<br>yes/no                                   | 50/<br>651     | 4.9/<br>64.9  |  |
| Secondary chest drainage,<br>yes/no                           | 57/<br>545     | 5.7/<br>54.4  |  |
| Re-intubation,<br>yes/no                                      | 64/<br>636     | 6.4/<br>63.5  |  |
| Tracheostomy,<br>yes/no                                       | 43/<br>656     | 4.3/<br>65.5  |  |
| Re-admission intensive-care<br>unit, yes/no                   | 50/<br>650     | 4.9/<br>64.9  |  |
| TUMOR ASSOCIATED FACTORS                                      |                |               |  |
| Histology                                                     |                |               |  |
| <i>ACC</i>                                                    | 842            | 84.03         |  |
| <i>SCC</i>                                                    | 147            | 14.7          |  |
| <i>other</i>                                                  | 12             | 1.2           |  |
| Adenocarcinoma of esophagogastric junction                    |                |               |  |
| <i>Siewert I</i>                                              | 284            | 28.3          |  |
| <i>Siewert II</i>                                             | 174            | 17.4          |  |
| <i>Siewert III</i>                                            | 12             | 1.2           |  |
| Tumor distance to the incisors, mean $\pm$ SD (cm)            |                |               |  |
| <i>Proximal margin</i>                                        | 33.2 $\pm$ 5.2 |               |  |
| <i>Distal margin</i>                                          | 39.1 $\pm$ 4.4 |               |  |
| Tumor stenosis at primary<br>staging (endoscopically), yes/no | 135/<br>53     | 13.5/<br>5.3  |  |
| CLINICAL TNM-STAGING AT PRIMARY STAGING                       |                |               |  |
| cT                                                            |                |               |  |
| <i>1</i>                                                      | 31             | 3.1           |  |
| <i>2</i>                                                      | 49             | 4.9           |  |
| <i>3</i>                                                      | 269            | 26.8          |  |
| <i>4</i>                                                      | 3              | 2.9           |  |
| cN                                                            |                |               |  |
| <i>0</i>                                                      | 25             | 24.9          |  |
| <i>1</i>                                                      | 168            | 16.8          |  |

|                                                    |                                       |             |       |
|----------------------------------------------------|---------------------------------------|-------------|-------|
|                                                    | 2                                     | 13          | 1.3   |
|                                                    | 3                                     | 3           | 0.3   |
|                                                    | <i>x</i>                              | 111         | 11.1  |
| cM                                                 |                                       |             |       |
|                                                    | 0                                     | 241         | 24.1  |
|                                                    | 1                                     | 27          | 2.7   |
|                                                    | <i>x</i>                              | 24          | 2.4   |
| PATHOLOGICAL TNM CLASSIFICATION                    |                                       |             |       |
| pT                                                 |                                       |             |       |
|                                                    | 0                                     | 135         | 13.5  |
|                                                    | 1a/1b                                 | 248         | 24.8  |
|                                                    | 2                                     | 157         | 15.7  |
|                                                    | 3                                     | 440         | 43.9  |
|                                                    | 4a/b                                  | 17          | 1.7   |
|                                                    | <i>Tis</i>                            | 1           | 0.1   |
| pN                                                 |                                       |             |       |
|                                                    | 0                                     | 513         | 511.9 |
|                                                    | 1                                     | 250         | 24.9  |
|                                                    | 2                                     | 135         | 13.5  |
|                                                    | 3                                     | 100         | 9.9   |
| pL                                                 |                                       |             |       |
|                                                    | 0                                     | 600         | 59.9  |
|                                                    | 1                                     | 226         | 22.6  |
| pV                                                 |                                       |             |       |
|                                                    | 0                                     | 762         | 76.04 |
|                                                    | 1                                     | 59          | 5.9   |
| R                                                  |                                       |             |       |
|                                                    | 0                                     | 885         | 88.3  |
|                                                    | 1                                     | 40          | 3.9   |
|                                                    | 2                                     | 3           | 0.3   |
| Positive lymph nodes, mean ± SD (n)                |                                       | 2.3 ± 4.7   |       |
| Total resected lymph nodes, mean ± SD (n)          |                                       | 30.8 ± 11.3 |       |
| Positive lymph node quotient, mean ± SD (n)        |                                       | 0.07 ± 0.14 |       |
| Pathological tumor margin distance, mean ± SD (mm) |                                       |             |       |
|                                                    | <i>Proximal margin</i>                | 36.7 ± 18.1 |       |
|                                                    | <i>Distal margin</i>                  | 45.2 ± 23.4 |       |
| Tumor regression grade                             |                                       |             |       |
|                                                    | 1: > 50% rest vital tumor cells (RVT) | 127         | 12.7  |
|                                                    | 2: 10 - 50% RVT                       | 146         | 14.6  |
|                                                    | 3: < 10 % RVT                         | 130         | 12.9  |
|                                                    | 4: no RVT                             | 118         | 11.8  |
| BIOMARKER                                          |                                       |             |       |

|                                                                  |     |       |
|------------------------------------------------------------------|-----|-------|
| Insulin-like growth factor II mRNA-binding protein 3 (IMP-3) [3] |     |       |
| 0: no expression                                                 | 59  | 58.9  |
| 1: weak expression                                               | 61  | 6.1   |
| 2: moderate expression                                           | 125 | 12.5  |
| E-Cadherin                                                       |     |       |
| 0: no expression                                                 | 8   | 0.8   |
| 1: weak expression                                               | 60  | 5.9   |
| 2: moderate expression                                           | 175 | 17.5  |
| Carbonic anhydrase IX (CAIX)                                     |     |       |
| 0: no expression                                                 | 128 | 12.8  |
| 1: weak expression                                               | 62  | 6.2   |
| 2: moderate expression                                           | 43  | 4.3   |
| Class III $\beta$ -tubulin (TUBB3) [4]                           |     |       |
| 0: no expression                                                 | 55  | 5.5   |
| 1: weak expression                                               | 66  | 6.6   |
| 2: moderate expression                                           | 55  | 5.5   |
| 3: strong expression                                             | 52  | 5.2   |
| TP-53 mutation [5]                                               |     |       |
| 0: mutant = no expression                                        | 97  | 9.7   |
| 1: wild-type protein                                             | 111 | 11.07 |
| 2: mutant = overexpression                                       | 282 | 28.1  |
| Ki-67 (expression, %)                                            |     |       |
| 1: 1% – 9%                                                       | 97  | 9.7   |
| 2: 10% – 19%                                                     | 42  | 4.2   |
| 3: 20% – 39%                                                     | 84  | 8.4   |
| 4: $\geq 40\%$                                                   | 66  | 6.6   |
| Murine double minute-2 (MDM-2), IHC                              |     |       |
| 0: negative                                                      | 267 | 26.6  |
| 1: weak/moderate, few cells                                      | 16  | 15.9  |
| 2: weak/moderate, many cells                                     | 16  | 15.9  |
| 3: strong expression                                             | 6   | 0.6   |
| MDM2, FISH [5]                                                   |     |       |
| 0: negative amplification                                        | 288 | 28.7  |
| 1: positive amplification                                        | 16  | 1.6   |
| Lymphocyte activation gene-3 (LAG-3)                             |     |       |
| 0: negative                                                      | 200 | 19.9  |
| 1: 1-2%                                                          | 59  | 5.9   |
| 2: 3-5%                                                          | 15  | 1.5   |

|                                                    |     |      |
|----------------------------------------------------|-----|------|
| High mobility group box 1 (HMGB-1)                 |     |      |
| 0: no expression                                   | 84  | 8.4  |
| 1: weak expression                                 | 59  | 5.9  |
| 2: moderate expression                             | 65  | 6.5  |
| 3: strong expression                               | 137 | 13.7 |
| MutL homolog 1 (MLH-1)                             |     |      |
| 0: Microsatellite instability                      | 15  | 1.5  |
| 1: Microsatellite stable                           | 493 | 49.3 |
| CD-3                                               |     |      |
| 1: low expression                                  | 198 | 19.8 |
| 2: high expression                                 | 72  | 7.2  |
| CD3, expression tumor center [6]                   |     |      |
| 0: peritumoral                                     | 248 | 24.8 |
| 2: intratumoral                                    | 22  | 2.2  |
| X-linked inhibitor of apoptosis protein (XIAP) [7] |     |      |
| 0: no expression                                   | 25  | 2.5  |
| 1: weak expression                                 | 118 | 11.8 |
| 2: moderate expression                             | 84  | 8.4  |
| 3: strong expression                               | 38  | 3.8  |
| Mesothelin (Novocastra antibody) [8]               |     |      |
| 0: no expression                                   | 208 | 20.8 |
| 1: low/moderate                                    | 74  | 7.4  |
| 2: high                                            | 42  | 4.2  |
| Mesothelin (Ventana antibody) [8]                  |     |      |
| 0: no expression                                   | 155 | 15.4 |
| 1: low/moderate                                    | 92  | 9.2  |
| 2: high                                            | 73  | 7.3  |
| Claudin (expression, %)                            |     |      |
| 0: no expression                                   | 267 | 26.6 |
| 1: $\geq 5\%$ - 49%                                | 38  | 3.8  |
| 2: $\geq 50\%$                                     | 26  | 2.6  |
| AT-rich interactive domain 1A (ARID1A) [9]         |     |      |
| 0: mutated/deleted gene                            | 43  | 4.3  |
| 1: intact gene                                     | 464 | 46.3 |
| SMARCA4 (BRG-1) [9]                                |     |      |
| 0: mutated/deleted gene                            | 11  | 1.1  |
| 1: intact gene                                     | 432 | 43.1 |
| SMARCA2 (BRM) [9]                                  |     |      |
| 0: mutated/deleted gene                            | 39  | 3.9  |
| 1: intact gene                                     | 414 | 41.3 |

|                                                                                    |     |       |
|------------------------------------------------------------------------------------|-----|-------|
| Indoleamine 2,3-dioxygenase (IDO) expressed on tumor infiltrating lymphocytes [10] |     |       |
| 0: negative expression                                                             | 168 | 16.8  |
| 1: low inflammation                                                                | 123 | 12.3  |
| 2: high inflammation                                                               | 52  | 5.2   |
| Indoleamine 2,3-dioxygenase (IDO) expressed on tumor cells                         |     |       |
| 0: no expression                                                                   | 300 | 29.9  |
| 1: weak expression                                                                 | 30  | 2.9   |
| 2: high expression                                                                 | 14  | 1.4   |
| T-cell immunoglobulin and mucin-domain containing-3 (TIM-3)                        |     |       |
| 0: negative expression                                                             | 158 | 15.8  |
| 1: low inflammation                                                                | 109 | 10.9  |
| 2: high inflammation                                                               | 67  | 6.7   |
| Aldo-keto reductase family 1 (AKR1)                                                |     |       |
| 0: negative                                                                        | 35  | 3.5   |
| 1: low level                                                                       | 120 | 11.9  |
| 2: intermediate level                                                              | 86  | 8.6   |
| 3: high level                                                                      | 52  | 5.2   |
| Gremlin1 (GREM1)                                                                   |     |       |
| 0: negative                                                                        | 22  | 2.2   |
| 1: low level                                                                       | 142 | 14.2  |
| 2: high level                                                                      | 64  | 6.4   |
| c-MYC                                                                              |     |       |
| 0: no amplification                                                                | 294 | 29.3  |
| 1: low amplification                                                               | 22  | 2.2   |
| 2: high amplification                                                              | 41  | 4.1   |
| KRAS                                                                               |     |       |
| 0: negative amplification                                                          | 296 | 29.5  |
| 1: positive amplification                                                          | 70  | 6.9   |
| GATA-binding factor (GATA6) [11]                                                   |     |       |
| 0: negative amplification                                                          | 311 | 31.03 |
| 1: positive amplification                                                          | 33  | 3.3   |
| Her2/neu, IHC [12]                                                                 |     |       |
| 0: negative staining                                                               | 438 | 43.7  |
| 1: very weak                                                                       | 1   | 0.1   |
| 2: weak/moderate                                                                   | 15  | 1.5   |
| 3: strong                                                                          | 29  | 2.9   |
| Her2/neu, FISH [12]                                                                |     |       |
| 0: negative amplification                                                          | 326 | 32.5  |
| 1: positive amplification                                                          | 31  | 3.1   |

|                                                                                   |     |      |  |
|-----------------------------------------------------------------------------------|-----|------|--|
| Loss of Y-chromosome (LoY), long arm [13]                                         |     |      |  |
| 0: negative                                                                       | 170 | 16.9 |  |
| 1: positive                                                                       | 125 | 12.5 |  |
| LoY, short arm [13]                                                               |     |      |  |
| 0: negative                                                                       | 164 | 16.4 |  |
| 1: positive                                                                       | 131 | 13.1 |  |
| Phosphatase and tensin homolog<br>deleted on chromosome 10 (PTEN)                 |     |      |  |
| 0: negative                                                                       | 32  | 3.2  |  |
| 1: weak signal                                                                    | 74  | 7.4  |  |
| 2: normal signal                                                                  | 296 | 29.5 |  |
| Fructose-1,6-bisphosphatase 1 (FBP1)<br>[14]                                      |     |      |  |
| 0: no expression                                                                  | 65  | 6.4  |  |
| 1: weak                                                                           | 94  | 9.4  |  |
| 2: moderate                                                                       | 133 | 13.3 |  |
| 3: strong                                                                         | 78  | 7.8  |  |
| Ubiquilin-4 (UBQLN4, dots/tumorcells)                                             |     |      |  |
| 0: 0 or < 1                                                                       | 71  | 7.1  |  |
| 1: 1-3                                                                            | 125 | 12.5 |  |
| 2: 4-9                                                                            | 105 | 10.5 |  |
| 3: ≥ 10                                                                           | 18  | 1.8  |  |
| Trimethylation of lysine 27 on histone H3<br>(H3K27me3)                           |     |      |  |
| 0: negative                                                                       | 42  | 4.2  |  |
| 1: partly positive                                                                | 67  | 6.7  |  |
| 2: completely positive                                                            | 185 | 18.5 |  |
| p16, IHC                                                                          |     |      |  |
| 0: negative                                                                       | 276 | 27.5 |  |
| 1: partly positive                                                                | 44  | 4.4  |  |
| 2: completely positive                                                            | 63  | 6.3  |  |
| p16, FISH                                                                         |     |      |  |
| 0: no deletion                                                                    | 202 | 20.2 |  |
| 1: hemizygous<br>deletion                                                         | 35  | 3.5  |  |
| 2: homozygous<br>deletion                                                         | 78  | 7.8  |  |
| Trophoblast Cell Surface Antigen 2 (TROP2)<br>[15],<br>(H-Score expression level) |     |      |  |
| 0: no expression                                                                  | 43  | 4.3  |  |
| 1: weak expression                                                                | 85  | 8.5  |  |
| 2: moderate<br>expression                                                         | 183 | 18.3 |  |
| 3: strong expression                                                              | 76  | 7.6  |  |
| AKR                                                                               |     |      |  |
| 0: no expression                                                                  | 28  | 2.8  |  |
| 1: weak expression                                                                | 88  | 8.8  |  |



|                                                 |     |      |
|-------------------------------------------------|-----|------|
| 2: moderate expression                          | 120 | 11.9 |
| 3: strong expression                            | 104 | 10.4 |
| F-box and WD repeat domain containing 7 (FBXW7) |     |      |
| 0: negative                                     | 28  | 2.8  |
| 1: weak signal                                  | 59  | 5.9  |
| 2: normal signal                                | 294 | 29.3 |
| Cyclin D1, IHC                                  |     |      |
| 0: no expression                                | 161 | 16.1 |
| 1: weak expression                              | 166 | 16.6 |
| 2: moderate expression                          | 59  | 5.9  |
| 3: strong expression                            | 4   | 0.4  |
| Cyclin D1, FISH                                 |     |      |
| 0: no amplification                             | 274 | 27.3 |
| 1: polyribosome                                 | 12  | 1.2  |
| 2: amplification                                | 13  | 1.3  |
| Cyclin Dependent Kinase 6 (CDK6), FISH          |     |      |
| 0: no amplification                             | 169 | 16.9 |
| 2: amplification                                | 13  | 1.3  |
| Periostin                                       |     |      |
| 0: negative                                     | 93  | 9.3  |
| 1: >5% - 30%                                    | 178 | 17.8 |
| 2: >30%                                         | 226 | 22.6 |
| Matrix metalloproteinase-2 (MMP-2)              |     |      |
| 0: no expression                                | 99  | 9.9  |
| 1: weak expression                              | 226 | 22.6 |
| 2: moderate expression                          | 159 | 15.9 |
| Homeobox protein NANOG                          |     |      |
| 0: no expression                                | 130 | 12.9 |
| 1: weak expression                              | 127 | 12.7 |
| 2: moderate expression                          | 235 | 23.5 |
| Cytokeratin 6 (CK6)                             |     |      |
| 0: negative                                     | 369 | 36.8 |
| 1: weak positive                                | 74  | 7.4  |
| 2: strong positive                              | 46  | 4.6  |
| N-myc down-regulated gene 1 (NDRG1)             |     |      |
| 0: no expression                                | 46  | 4.6  |
| 1: weak expression                              | 109 | 10.9 |
| 2: moderate expression                          | 92  | 9.2  |
| 3: strong expression                            | 134 | 13.4 |
| Thymidine phosphorylase (TYMP)                  |     |      |
| 0: no expression                                | 152 | 15.2 |
| 1: weak expression                              | 160 | 15.9 |

|                                                        |                        |     |      |
|--------------------------------------------------------|------------------------|-----|------|
|                                                        | 2: moderate expression | 120 | 11.9 |
|                                                        | 3: strong expression   | 57  | 5.7  |
| <hr/>                                                  |                        |     |      |
| Growth differentiation factor 15 (GDF-15), tumor cells |                        |     |      |
|                                                        | 0: negative            | 80  | 7.9  |
|                                                        | 1: low                 | 96  | 9.6  |
|                                                        | 2: medium              | 76  | 7.6  |
|                                                        | 3: strong              | 6   | 0.6  |
| <hr/>                                                  |                        |     |      |
| GDF15, stroma                                          |                        |     |      |
|                                                        | 0: negative            | 54  | 5.4  |
|                                                        | 1: low                 | 111 | 11.1 |
|                                                        | 2: medium              | 87  | 8.7  |
|                                                        | 3: strong              | 6   | 0.6  |
| <hr/>                                                  |                        |     |      |
| Mast cells                                             |                        |     |      |
|                                                        | 0: negative            | 171 | 17.1 |
|                                                        | 1: weak positive       | 278 | 27.8 |
|                                                        | 2: strong positive     | 102 | 10.2 |
| <hr/>                                                  |                        |     |      |
| Natural killer cells (NK cells)                        |                        |     |      |
|                                                        | 0: negative            | 329 | 32.8 |
|                                                        | 1: weak positive       | 217 | 21.7 |
|                                                        | 2: strong positive     | 8   | 0.8  |
| <hr/>                                                  |                        |     |      |
| Tumor-infiltrating plasma cells (TIP)                  |                        |     |      |
|                                                        | 0: negative            | 285 | 28.4 |
|                                                        | 1: weak positive       | 196 | 19.6 |
|                                                        | 2: strong positive     | 72  | 7.2  |
| <hr/>                                                  |                        |     |      |

**Supplementary Table 2.** Hyperparameters for each model after optimization. Randomized and Grid Search Cross Validation was used for Random Forest (RF), XG-Boost (XG) and Logistic Regression (LR). Best hyperparameters for Artificial Neural Network (ANN) and TabNet (TN) were selected using *Optuna*, an open-source optimization framework.

|            | Baseline Dataset                                                                                                                         | Primary Staging Dataset (PS)                                                                                                             | PS Dataset including tumor biomarker                                                                                                       |
|------------|------------------------------------------------------------------------------------------------------------------------------------------|------------------------------------------------------------------------------------------------------------------------------------------|--------------------------------------------------------------------------------------------------------------------------------------------|
| <b>RF</b>  | n_estimators= 62,<br>max_depth = 19,<br>min_samples_split = 2, min_samples_leaf = 3,<br>bootstrap=True,<br>max_features='auto'           | n_estimators= 65,<br>max_depth = 15,<br>min_samples_split = 2, min_samples_leaf = 3, bootstrap=False,<br>max_features='auto'             | n_estimators= 45,<br>max_depth = 13,<br>min_samples_split = 3, min_samples_leaf = 2, bootstrap=False,<br>max_features='auto'               |
|            | <i>AI-driven Reduced Datasets</i>                                                                                                        | n_estimators= 45,<br>max_depth = 17,<br>min_samples_split = 4, min_samples_leaf = 3,<br>bootstrap=True,<br>max_features='auto'           | n_estimators= 36,<br>max_depth = 22,<br>min_samples_split = 2, min_samples_leaf = 3, bootstrap=True,<br>max_features='auto'                |
| <b>XG</b>  | n_estimators = 79,<br>max_depth = 12,<br>subsample = 0.7,<br>colsample_bytree = 0.6, learning_rate = 0.05, reg_lambda = 0.7, gamma = 0.1 | n_estimators = 68,<br>max_depth = 8,<br>subsample = 0.8,<br>colsample_bytree = 0.7, learning_rate = 0.05, reg_lambda = 1, gamma = 0.1    | n_estimators = 75,<br>max_depth = 5,<br>subsample = 0.8,<br>colsample_bytree = 0.5,<br>learning_rate = 0.05, gamma = 0.4, reg_lambda = 0.5 |
|            | <i>AI-driven Reduced Datasets</i>                                                                                                        | n_estimators = 29,<br>max_depth = 9,<br>subsample = 0.5,<br>colsample_bytree = 0.6, learning_rate = 0.05, reg_lambda = 0.5, gamma = 0.1, | n_estimators = 63,<br>max_depth = 3,<br>subsample = 0.6,<br>colsample_bytree = 0.5, learning_rate = 0.1, reg_lambda = 0.1, gamma = 0.0     |
| <b>ANN</b> | embed_p=0.35, ps=0.5, layers=[120], n_epochs = 8, lr_max=0.00898                                                                         | embed_p=0.2, ps=0.3, layers=[25, 140], n_epochs = 15, lr_max=0.003804471                                                                 | embed_p=0.6, ps=0.45, layers=[100, 75], n_epochs = 8, lr_max=0.00500528                                                                    |
|            | <i>AI-driven Reduced Datasets</i>                                                                                                        | embed_p=0.25, ps=0.55, layers=[140, 140], n_epochs = 16, lr_max=0.006370                                                                 | embed_p=0.8, ps=0.7, layers=[75], n_epochs = 17, lr_max=0.0044824595                                                                       |
| <b>TN</b>  | mask_type = entmax, cat_emb_dim = 5, optimizer_fn=torch.optim.Adam, n_a = 16, n_d = 60, n_shared = 4,                                    | mask_type = entmax, cat_emb_dim = 4, optimizer_fn=torch.optim.Adam, n_a = 60, n_d = 16, n_shared = 1,                                    | mask_type = entmax, cat_emb_dim = 2, optimizer_fn=torch.optim.Adam, n_a = 40, n_d = 36, n_shared = 5,                                      |

|                                           |                                                                                                                                                                                                                                                                                         |                                                                                                                                                                     |                                                                                                                                                                                                                                                                                       |
|-------------------------------------------|-----------------------------------------------------------------------------------------------------------------------------------------------------------------------------------------------------------------------------------------------------------------------------------------|---------------------------------------------------------------------------------------------------------------------------------------------------------------------|---------------------------------------------------------------------------------------------------------------------------------------------------------------------------------------------------------------------------------------------------------------------------------------|
|                                           | n_steps = 3,<br>n_independent = 1,<br>optimizer_params=dict(lr=2e-2),<br>scheduler_params=step_size:12,<br>gamma:1.0,<br>scheduler_fn=torch.optim.lr_scheduler.StepLR,                                                                                                                  | n_steps = 1,<br>n_independent = 1,<br>optimizer_params=dict(lr=2e-2),<br>scheduler_params=step_size:12, gamma":1.4,<br>scheduler_fn=torch.optim.lr_scheduler.StepLR | n_steps = 5,<br>n_independent = 1,<br>optimizer_params=dict(lr=2e-2),<br>scheduler_params=step_size:20, gamma:1.4,<br>scheduler_fn=torch.optim.lr_scheduler.StepLR                                                                                                                    |
| <i>AI-driven<br/>Reduced<br/>Datasets</i> | mask_type = 'entmax',<br>cat_emb_dim = 4,<br>optimizer_fn=torch.optim.Adam, n_a = 12,<br>n_d = 48, n_shared = 1,<br>n_steps = 5,<br>n_independent = 3,<br>optimizer_params=dict(lr=2e-2),<br>scheduler_params=step_size:10, gamma:1.4,<br>scheduler_fn=torch.optim.lr_scheduler.StepLR, |                                                                                                                                                                     | mask_type = 'entmax',<br>cat_emb_dim = 1,<br>optimizer_fn=torch.optim.Adam, n_a = 52,<br>n_d = 28, n_shared = 3,<br>n_steps = 9,<br>n_independent = 2,<br>optimizer_params=dict(lr=2e-2),<br>scheduler_params=step_size:6, gamma:1.2,<br>scheduler_fn=torch.optim.lr_scheduler.StepLR |
| <b>LR</b>                                 | penalty = none,<br>max_iter = 2000,<br>solver = saga                                                                                                                                                                                                                                    | penalty = none,<br>max_iter = 3000,<br>solver = sag                                                                                                                 | penalty = none,<br>max_iter = 5000, solver = saga                                                                                                                                                                                                                                     |

12

13

## Supplementary References

1. Shapiro, J.; van Lanschot, J.J.B.; Hulshof, M.; van Hagen, P.; van Berge Henegouwen, M.I.; Wijnhoven, B.P.L.; van Laarhoven, H.W.M.; Nieuwenhuijzen, G.A.P.; Hospers, G.A.P.; Bonenkamp, J.J.; et al. Neoadjuvant chemoradiotherapy plus surgery versus surgery alone for oesophageal or junctional cancer (CROSS): long-term results of a randomised controlled trial. *Lancet Oncol* **2015**, *16*, 1090-1098, doi:10.1016/s1470-2045(15)00040-6.
2. Al-Batran, S.E.; Homann, N.; Pauligk, C.; Goetze, T.O.; Meiler, J.; Kasper, S.; Kopp, H.G.; Mayer, F.; Haag, G.M.; Luley, K.; et al. Perioperative chemotherapy with fluorouracil plus leucovorin, oxaliplatin, and docetaxel versus fluorouracil or capecitabine plus cisplatin and epirubicin for locally advanced, resectable gastric or gastro-oesophageal junction adenocarcinoma (FLOT4): a randomised, phase 2/3 trial. *Lancet* **2019**, *393*, 1948-1957, doi:10.1016/s0140-6736(18)32557-1.
3. Plum, P.S.; Ulase, D.; Bollschweiler, E.; Chon, S.H.; Berth, F.; Zander, T.; Alakus, H.; Hölscher, A.H.; Bruns, C.J.; Schallenberg, S.; et al. Upregulation of insulin-like growth factor II mRNA-binding protein 3 (IMP3) has negative prognostic impact on early invasive (pT1) adenocarcinoma of the esophagus. *J Cancer Res Clin Oncol* **2018**, *144*, 1731-1739, doi:10.1007/s00432-018-2698-1.
4. Loeser, H.; Schallenberg, S.; von Winterfeld, M.; Tharun, L.; Alakus, H.; Hölscher, A.; Bollschweiler, E.; Buettner, R.; Zander, T.; Quaas, A. High protein and mRNA expression levels of TUBB3 (class III  $\beta$ -tubulin) are associated with aggressive tumor features in esophageal adenocarcinomas. *Oncotarget* **2017**, *8*, 115179-115189, doi:10.18632/oncotarget.23112.
5. Quaas, A.; Heydt, C.; Gebauer, F.; Alakus, H.; Loeser, H.; Buettner, R.; Hillmer, A.; Bruns, C.; Merkelbach-Bruse, S.; Zander, T.; et al. Genomic Characterization of TP53-Wild-Type Esophageal Carcinoma. *Transl Oncol* **2019**, *12*, 154-161, doi:10.1016/j.tranon.2018.09.007.
6. Schoemmel, M.; Loeser, H.; Kraemer, M.; Wagener-Rydzek, S.; Hillmer, A.; Bruns, C.; Thelen, M.; Schröder, W.; Zander, T.; Lechner, A.; et al. Distribution of tumor-infiltrating-T-lymphocytes and possible tumor-escape mechanisms avoiding immune cell attack in locally advanced adenocarcinomas of the esophagus. *Clin Transl Oncol* **2021**, *23*, 1601-1610, doi:10.1007/s12094-021-02556-2.
7. Schiffmann, L.M.; Göbel, H.; Löser, H.; Schorn, F.; Werthenbach, J.P.; Fuchs, H.F.; Plum, P.S.; Bludau, M.; Zander, T.; Schröder, W.; et al. Elevated X-linked inhibitor of apoptosis protein (XIAP) expression uncovers detrimental prognosis in subgroups of neoadjuvant treated and T-cell rich esophageal adenocarcinoma. *BMC Cancer* **2019**, *19*, 531, doi:10.1186/s12885-019-5722-1.
8. Moentenich, V.; Comut, E.; Gebauer, F.; Tuchscherer, A.; Bruns, C.; Schroeder, W.; Buettner, R.; Alakus, H.; Loeser, H.; Zander, T.; et al. Mesothelin expression in esophageal adenocarcinoma and squamous cell carcinoma and its possible impact on future treatment strategies. *Ther Adv Med Oncol* **2020**, *12*, 1758835920917571, doi:10.1177/1758835920917571.
9. Schallenberg, S.; Bork, J.; Essakly, A.; Alakus, H.; Buettner, R.; Hillmer, A.M.; Bruns, C.; Schroeder, W.; Zander, T.; Loeser, H.; et al. Loss of the SWI/SNF-ATPase subunit members SMARCF1 (ARID1A), SMARCA2 (BRM), SMARCA4 (BRG1) and SMARCB1 (INI1) in oesophageal adenocarcinoma. *BMC Cancer* **2020**, *20*, 12, doi:10.1186/s12885-019-6425-3.
10. Loeser, H.; Kraemer, M.; Gebauer, F.; Bruns, C.; Schröder, W.; Zander, T.; Alakus, H.; Hölscher, A.; Buettner, R.; Lohneis, P.; et al. Indoleamine 2,3-Dioxygenase (IDO) Expression Is an Independent Prognostic Marker in Esophageal Adenocarcinoma. *J Immunol Res* **2020**, *2020*, 2862647, doi:10.1155/2020/2862647.
11. Plum, P.S.; Löser, H.; Zander, T.; Essakly, A.; Bruns, C.J.; Hillmer, A.M.; Alakus, H.; Schröder, W.; Büttner, R.; Gebauer, F.; et al. GATA binding protein 6 (GATA6) is co-amplified with PIK3CA in patients with esophageal adenocarcinoma and is linked to neoadjuvant therapy. *J Cancer Res Clin Oncol* **2021**, *147*, 1031-1040, doi:10.1007/s00432-020-03486-2.
12. Plum, P.S.; Gebauer, F.; Krämer, M.; Alakus, H.; Berth, F.; Chon, S.H.; Schiffmann, L.; Zander, T.; Büttner, R.; Hölscher, A.H.; et al. HER2/neu (ERBB2) expression and gene amplification correlates with better survival in esophageal adenocarcinoma. *BMC Cancer* **2019**, *19*, 38, doi:10.1186/s12885-018-5242-4.
13. Loeser, H.; Wölwer, C.B.; Alakus, H.; Chon, S.H.; Zander, T.; Buettner, R.; Hillmer, A.M.; Bruns, C.J.; Schroeder, W.; Gebauer, F.; et al. Y Chromosome Loss is a Frequent Event in Barrett's Adenocarcinoma and Associated with Poor Outcome. *Cancers (Basel)* **2020**, *12*, doi:10.3390/cancers12071743.
14. Damanakis, A.; Plum, P.S.; Gebauer, F.; Schröder, W.; Büttner, R.; Zander, T.; Bruns, C.J.; Quaas, A. Fructose-1,6-bisphosphatase 1 (FBP1) is an independent biomarker associated with a favorable prognosis in esophageal adenocarcinoma. *J Cancer Res Clin Oncol* **2022**, *148*, 2287-2293, doi:10.1007/s00432-022-04025-x.
15. Hoppe, S.; Meder, L.; Gebauer, F.; Ullrich, R.T.; Zander, T.; Hillmer, A.M.; Buettner, R.; Plum, P.; Puppe, J.; Malter, W.; et al. Trophoblast Cell Surface Antigen 2 (TROP2) as a Predictive Bio-Marker for the Therapeutic Efficacy of Sacituzumab Govitecan in Adenocarcinoma of the Esophagus. *Cancers (Basel)* **2022**, *14*, doi:10.3390/cancers14194789.

**Disclaimer/Publisher's Note:** The statements, opinions and data contained in all publications are solely those of the individual author(s) and contributor(s) and not of MDPI and/or the editor(s). MDPI and/or the editor(s) disclaim responsibility for any injury to people or property resulting from any ideas, methods, instructions or products referred to in the content.
